# Supplementary material for: Conformational disorder in energy transfer: beyond Förster theory
Source: Royal Society of Chemistry journal article supplement (doi:10.1039/c3cp50857a), 2013-01-01
Supplement: c3cp50857a.pdf [file c3cp50857a.pdf]

# Supplementary Material for “Conformational Disorder in Energy Transfer: Beyond Förster Theory”

Tammie Nelson,<sup>1</sup> Sebastian Fernandez-Alberti,<sup>2</sup> Adrian E. Roitberg,<sup>3</sup> and Sergei Tretiak<sup>1</sup>

*<sup>1</sup>Theoretical Division, Center for Nonlinear Studies (CNLS),*

*and Center for Integrated Nanotechnologies (CINT),*

*Los Alamos National Laboratory, Los Alamos, New Mexico, 87545, USA*

*<sup>2</sup>Universidad Nacional de Quilmes, Roque Saenz Pea 352, B1876BXD Bernal, Argentina*

*<sup>3</sup>Departments of Physics and Chemistry, Quantum Theory Project,*

*University of Florida, Gainesville, FL 32611, USA*

## Figures

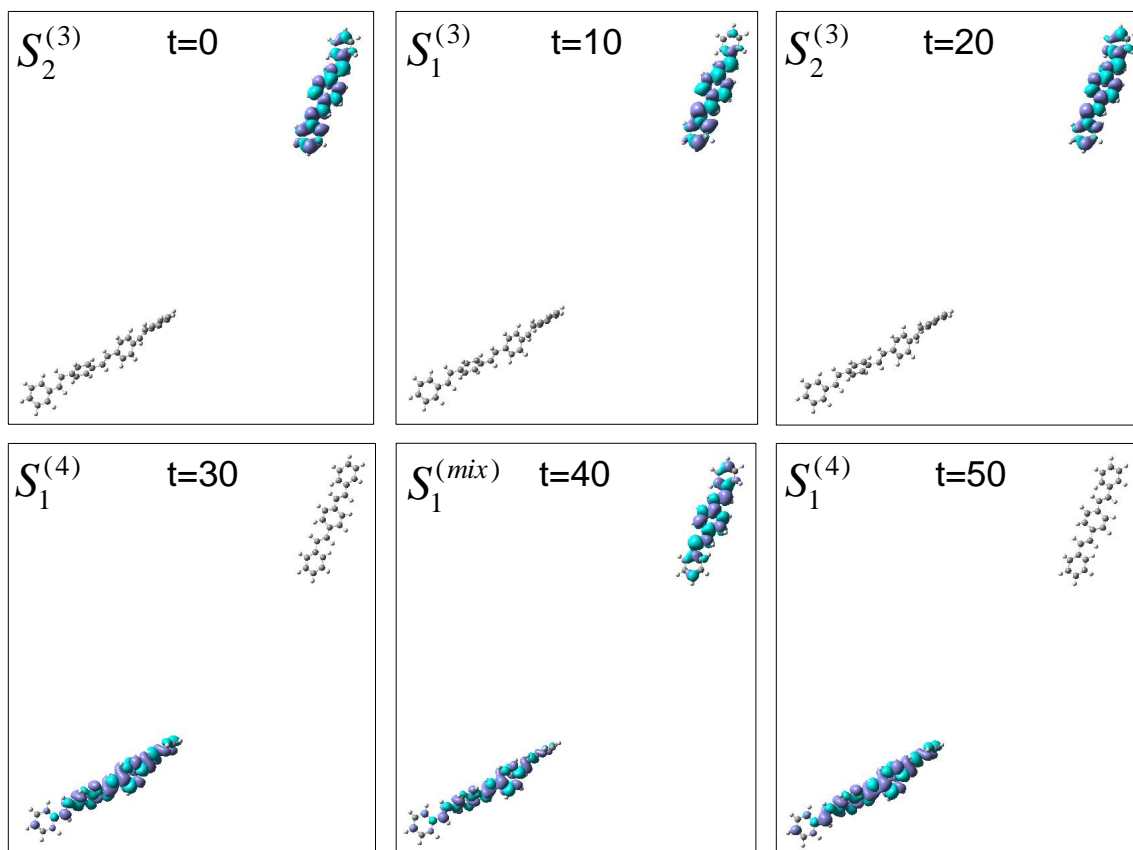

FIG. S1: Snapshots from the  $S_2^{(3)} \rightarrow S_1^{(4)}$  trajectory revealing the localization of the transition density and the conformational configuration. The time is given in femtosecond.

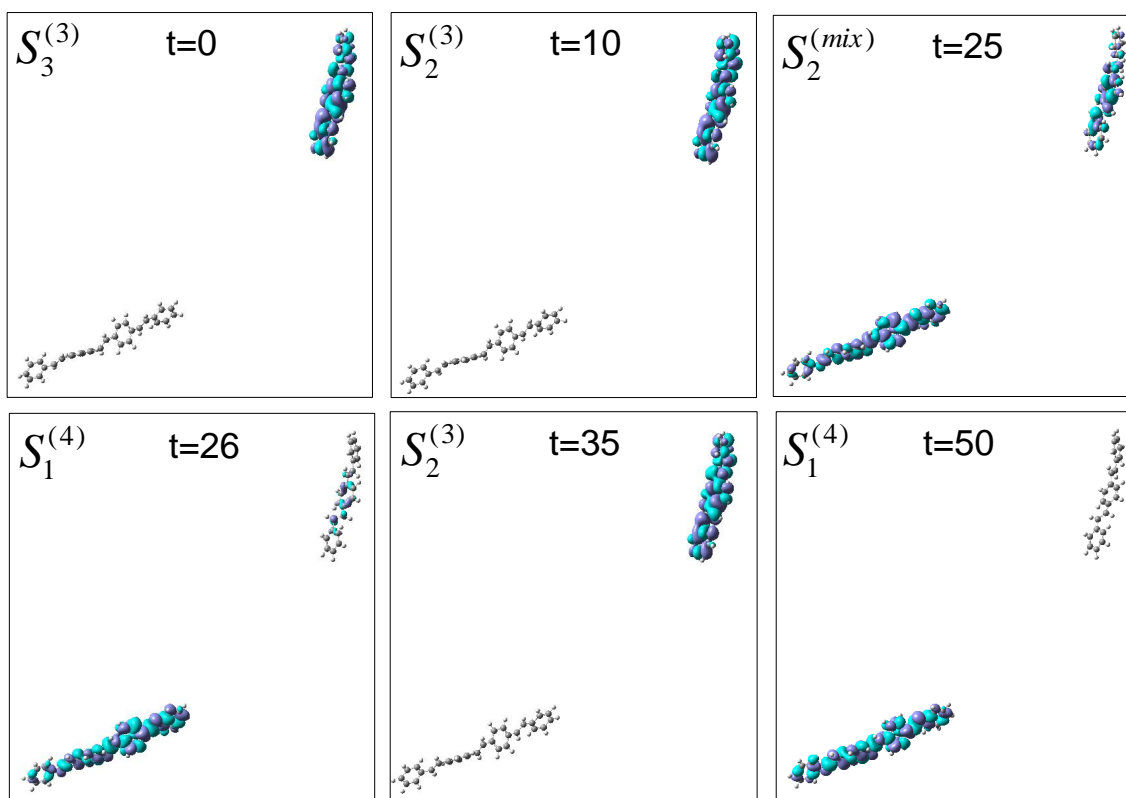

FIG. S2: Snapshots from the  $S_3^{(3)} \rightarrow S_1^{(4)}$  trajectory revealing the localization of the transition density and the conformational configuration. The time is given in femtosecond.
